# Supplementary material for: Characterisation and imaging of cortical impedance changes during interictal and ictal activity in the anaesthetised rat
Source: PubMed Central journal article supplement — Neuroimage. 2016 Jan 1;124(Pt A):813–23. doi: 10.1016/j.neuroimage.2015.09.015 (PMC4655942; doi:10.1016/j.neuroimage.2015.09.015), 2016-01-01
Supplement: mmc5.pdf [file mmc5.pdf]

## Supplementary Figure

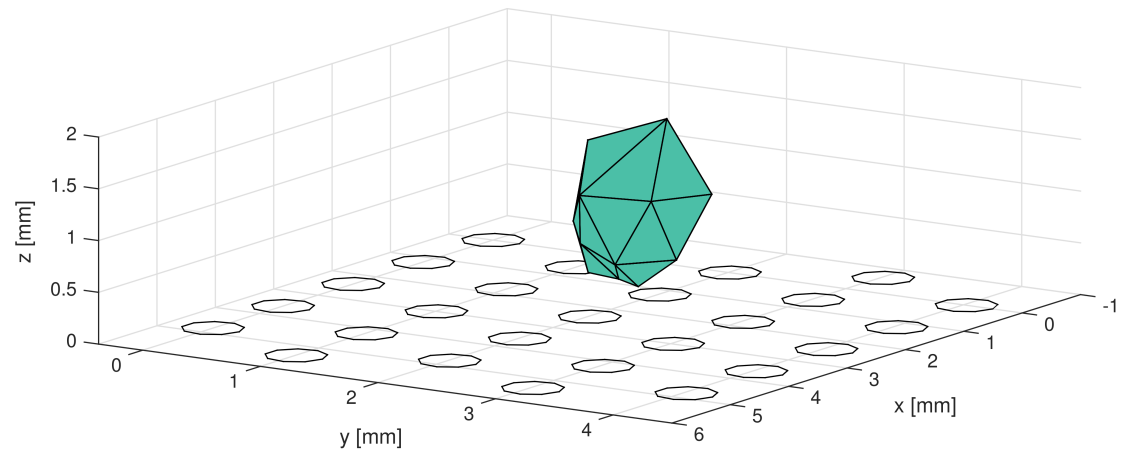

**Supplementary Figure 1.** Reconstruction of 1-mm-diameter glass bead placed 1 mm away from the electrode array. The glass bead appeared as a region of higher impedance than the saline background. Image shows the electrodes (black circles) and the voxels (cyan) with impedance changes ( $dZ$ ) greater than 50%.
